# Supplementary material
Source: PubMed Central journal article supplement (PMC7260984)
Supplement: pnas.1922287117.sapp.pdf [file pnas.1922287117.sapp.pdf]

## Supplementary Information for

**Maternal glyphosate exposure causes autism-like behaviors in offspring through increased expression of soluble epoxide hydrolase**

**Yaoyu Pu<sup>a</sup>, Jun Yang<sup>b</sup>, Lijia Chang<sup>a</sup>, Youge Qu<sup>a</sup>, Siming Wang<sup>a</sup>, Kai Zhang<sup>a</sup>,  
Zhongwei Xiong<sup>a</sup>, Jiancheng Zhang<sup>a</sup>, Yunfei Tan<sup>a</sup>, Xingming Wang<sup>a</sup>, Yuko Fujita<sup>a</sup>,  
Tamaki Ishima<sup>a</sup>, Debin Wan<sup>b</sup>, Sung Hee Hwang<sup>b</sup>, Bruce D. Hammock<sup>b,1</sup> and  
Kenji Hashimoto<sup>a,1</sup>**

**Affiliations:** <sup>a</sup>Division of Clinical Neuroscience, Chiba University Center for Forensic Mental Health, Chiba 260-8670, Japan; <sup>b</sup>Department of Entomology and Nematology and UC Davis Comprehensive Cancer Center, University of California, Davis, CA 95616, USA.

Dr. Kenji Hashimoto (hashimoto@faculty.chiba-u.jp) or Dr. Bruce D. Hammock (bdhammock@ucdavis.edu)

### **This PDF file includes:**

Supplementary information text  
Figs. S1 to S2  
Tables S1 to S8  
References for SI reference citations

## SI Materials and Methods

**Animals and animal care.** Pregnant ddY mice (embryo at the 5<sup>th</sup> day (E5), 9-10 weeks old) were purchased from Japan SLC Inc. (Hamamatsu, Shizuoka, Japan). Pregnant mice in each clear polycarbonate cage (22.5 × 33.8 × 14.0 cm) were housed singly under controlled temperatures and 12 hour light/dark cycles (lights on between 07:00–19:00 h), with ad libitum food (CE-2; CLEA Japan, Inc., Tokyo, Japan) and water. The protocol was approved by the Chiba University Institutional Animal Care and Use Committee.

This study was carried out in strict accordance with the recommendations in the Guide for the Care and Use of Laboratory Animals of the National Institutes of Health, USA.

**Treatment of glyphosate in drinking water into pregnant mice.** In this study, we used commercially available Roundup<sup>®</sup> Maxload [48% (w/v) glyphosate (*N*-phosphonomethylglycine) potassium salt, 52% other ingredients such as water and surfactant. Lot number: 11946898. Nissan Chemical Corporation, Tokyo, Japan].

Previous studies used drinking water containing 0.38% (w/v) glyphosate (expressed as free base: 1% Roundup<sup>®</sup>) during pregnancy and lactation, equivalent to 50 mg/kg/day of glyphosate (1,2). This corresponded with 1/20 of the glyphosate no-observed-adverse-effect level, as described previously (3). Therefore, water or formulated glyphosate [or 0.1, 0.25, 0.50, 0.75, 1.0 % Roundup<sup>®</sup>] were given to the pregnant mice from E5 to P21 (weaning). The male offspring were separated from their mothers at weaning (P21), and mice were caged each three - five in the groups in clear polycarbonate cage (22.5 × 33.8 × 14.0 cm). Mice were housed under controlled temperatures and 12 hour light/dark cycles (lights on between 07:00–19:00 h), with ad libitum food and water.

**Measurement of glyphosate in the blood.** Water or 0.098% (w/v) formulated glyphosate was given to pregnant mice from E5 to P21, as described above. At weaning (P21), mothers and male offspring mice were deeply anesthetized with isoflurane and plasma was collected. The plasma samples were stored at -80°C before assay.

Measurement of glyphosate in the plasma was performed using LC/MS/MS at UC Davis.

The 40 µL of internal standard (2 µg/mL of glyphosate-2-<sup>13</sup>C solution in methanol) and 40 µL of methanol were added to 20 µL of plasma. The spiked sample was vortexed for 5 minutes and then centrifuged at 16,100 g/min for another 5 minutes. The supernatants were transferred for the following LC/MS/MS measurement, which used a Waters Acquity UPLC system (Waters, Milford, MA) interfaced with a QTRAP 6500+ mass spectrometer (Sciex, Redwood City, CA) using an electrospray source. The separation was achieved on a Waters Acquity BEH C18 50 × 2.1 mm 1.7 µm column with mobile phases of water with 0.1% of formic acid as mobile phase A and acetonitrile with 0.1% of formic acid as mobile phase B. The gradient was shown in **Table S7**. All the parameters on the mass spectrometer were optimized with pure standards of glyphosate and glyphosate-2-<sup>13</sup>C (purchased from Millipore Sigma, Burlington MA) under positive MRM mode. The detailed parameters were given in **Table S8**.

**Table S7. The liquid chromatography gradient used for the analysis of glyphosate.**

| Time    | Flow Rate | %A | %B | Curve   |
|---------|-----------|----|----|---------|
| Initial | 0.35      | 75 | 25 | Initial |
| 0.5     | 0.35      | 75 | 25 | 6       |
| 2       | 0.35      | 10 | 90 | 6       |
| 3       | 0.35      | 10 | 90 | 6       |
| 3.1     | 0.35      | 75 | 25 | 6       |
| 5       | 0.35      | 75 | 25 | 6       |

**Table S8. The optimization of the mass transitions of mass spectrometer for glyphosate.**

| Compounds                             | Q1    | Q3   | DP | CE | CXP |
|---------------------------------------|-------|------|----|----|-----|
| Glyphosate                            | 169.9 | 87.9 | 60 | 11 | 10  |
| Glyphosate_qualify                    | 169.9 | 60   | 60 | 21 | 8   |
| glyphosate-2- <sup>13</sup> C         | 170.9 | 88.9 | 60 | 14 | 15  |
| glyphosate-2- <sup>13</sup> C quality | 170.9 | 61   | 60 | 28 | 9   |

**Collection of blood and brain samples and oxylipin analysis.** Water or 0.098% (w/v) formulated glyphosate was given to pregnant mice from E5 to P21, as described above. The male offspring were separated from their mothers at weaning (P21). At juvenile (P28) stage, mice were deeply anesthetized with isoflurane and plasma was collected. Subsequently, brains were removed from the skulls. For Western blot analysis, brain regions such as prefrontal cortex (PFC), hippocampus, and striatum, were dissected from brain on ice. The samples were stored at -80°C before assay. For oxylipin analysis, plasma was collected after isoflurane anesthesia at a juvenile (P28) stage. Subsequently, PFC, hippocampus, and striatum were dissected from brain on ice, and the samples were stored at -80°C before assay. Measurement of eicosanoids in the plasma and brain regions was performed at UC Davis using the previously described method (4).

**Western blot analysis.** Western blot analysis was performed as reported previously (5-7). Basically, the tissue samples were homogenized in Laemmli lysis buffer. 50 µg of protein were measured using the DC protein assay kit (Bio-Rad), and incubated for 5 min at 95°C, with an equal volume of 125 mM Tris-HCl, pH6.8, 20% glycerol, 0.1% bromophenol blue, 10% β-mercaptoethanol, 4% sodium dodecyl sulfate, and subjected to sodium dodecyl sulfate polyacrylamide gel electrophoresis, using 7.5% or AnyKD mini-gels (Mini-PROTEAN® TGX™ Precast Gel; Bio-Rad, CA, USA). Proteins were transferred onto polyvinylidenedifluoride (PVDF) membranes using a Trans Blot Mini Cell (Bio-Rad). For immunodetection, the blots were blocked with 2% BSA in TBST (TBS + 0.1% Tween-20) for 1 h at room temperature (RT), and kept with primary sEH rabbit polyclonal antibody (prepared at UC Davis) overnight at 4°C. The next day, blots were

washed three times in TBST and incubated with horseradish peroxidase conjugated anti-rabbit or anti-mouse antibody 1 hour, at RT. After final three washes with TBST, bands were detected using the enhanced chemiluminescence (ECL) prime Western Blotting Detection system (GE Healthcare Bioscience). Images were captured with a ChemDoc imaging system (Bio-Rad), and the immunoreactive bands were analyzed by Image Lab software.

**Gene expression analysis by quantitative real-time PCR.** At juvenile (P28) stage, mice were sacrificed, and their brains were removed for measurement of gene expression of *Ephx2* mRNA. Brain regions such as PFC, hippocampus, and striatum were dissected from the brains on ice. A quantitative RT-PCR system (Step One Plus, Thermo Fisher Scientific, Yokohama, Japan) was used to measure mRNAs. The specific mRNA transcripts were quantified by TaqManGene Expression assays (Thermo Fisher Scientific, Yokohama, Japan). Expression levels of *Ephx2* (Mm01313813\_m1) was measured in brain tissue. Total RNA was extracted by use of an RNeasy Mini Kit (Qiagen, Hilden, Germany). The purity of total RNA was assessed by Biophotometer plus (Eppendorf, Hamburg, Germany). The RNA samples were used in the first strand cDNA synthesis with High Capacity cDNA Reverse Transcription Kit (#4368813 Thermo Fisher Scientific, Yokohama, Japan). All samples were tested in triplicate and average values were used for quantification. The average values were normalized to Vic-labeled *Actb* mRNA (Cat#4352341E: pre-developed TaqMan Assay Reagents, Thermo Fisher Scientific, Yokohama, Japan).

**Treatment of TPPU.** TPPU was dissolved in polyethylene glycol 400 (PEG 400: Tokyo Chemical Industry Co., Ltd, Tokyo, Japan). TPPU (3 mg/kg/day) or vehicle (5 ml/kg, PEG 400) were administered orally in the pregnant mice from E5 to P21. Behavioral tests of offspring were performed during juvenile stage (P28–P35) after maternal glyphosate exposure (**Fig. 1A**).

**Behavioral analysis.** Locomotion, the novel object recognition test (NORT), and prepulse inhibition (PPI) test were performed as reported previously (5,7-13).

**Locomotor Activity:** Both horizontal and rearing activity were monitored by an infrared ray passive sensor system (SCANET-SV10, Melquest Ltd., Toyama, Japan), and activity was integrated every minute. Individual mice were placed in activity chambers and allowed 1 hour of free exploration as spontaneous activity.

**Novel Object Recognition Test (NORT):** Mice were habituated for 10 minutes in the test box for 3 straight days. On 4th day, two objects (differing in shape and color but of similar size) were placed in the box 35.5 cm apart (symmetrically), and each animal was allowed to explore in the box for 5 minutes. The animals were considered to be exploring the object when the head of the animal was both facing and within 2.54 cm of the object or when any part of the body, except for the tail was touching the object. The time that mice spent exploring each object was recorded. After training, mice were immediately returned to their home cages, and the box and objects were cleaned with 75% ethanol, to

avoid any possible instinctive odorant cues. Retention tests were carried out at one-day intervals, following the respective training. During the retention test, each mouse was reintroduced into their original test box, and one of the training objects was replaced by a novel object. The mice were then allowed to explore freely for 5 minutes, and the time spent exploring each object was recorded. Throughout the experiments, the objects were counter-balanced, in terms of their physical complexity and emotional neutrality. A preference index, that is, the ratio of time spent exploring either of the two objects (training session) or the novel object (retention test session) over the total time spent exploring both objects, was used.

PPI: The offspring mice were tested for their acoustic startle reactivity (ASR) in a startle chamber (SR-LAB; San Diego Instruments, San Diego, CA, USA) using the standard methods described previously (9,10). The test sessions were begun after an initial 10-min acclimation period in the chamber. The mice were subjected to one of six trials: (1) pulse alone, as a 40 ms broadband burst; a pulse (40 ms broadband burst) preceded by 100 ms with a 20 ms prepulse that was (2) 4 dB, (3) 8 dB, (4) 12 dB, or (5) 16 dB over background (65 dB); and (6) background only (no stimulus). The amount of prepulse inhibition (PPI) was expressed as the percentage decrease in the amplitude of the startle reactivity caused by presentation of the prepulse (% PPI). The PPI test lasted 20 min in total.

Three-chamber Social Interaction Test: The three-chamber social interaction test was performed to investigate sociability and preference for social novelty in mice, as reported previously (7). The apparatus consisted of a rectangular, three-chambered box and a lid with a video camera (BrainScience Idea, Co., Ltd, Osaka, Japan). Each chamber (20 cm × 40 cm × 20 cm) was divided by a clear plastic wall with a small square opening (5 cm × 8 cm). First, each subject mouse was placed in the box and allowed to explore for 10 min to habituate the environment. During the session, an empty wire cage (10 cm in diameter, 17.5 cm in height, with vertical bars 0.3 cm apart) was located in the center of left and right chamber. Next, an unfamiliar ddY male mouse (stranger 1) that had no prior contact with the subject mouse was put into a wire cage that was placed into one of the side chambers. To assess sociability, the subject mouse was allowed to explore the box for an additional 10-min session. Finally, to evaluate social preference for a new stranger, a second stranger male mouse (stranger 2) was placed into the wire cage that had been empty during the first 10-min session (social novelty preference test). Thus, the subject mouse had a choice between the first, non-familiar mouse (stranger 1) and the novel unfamiliar mouse (stranger 2). The time spent in each chamber and the time spent around each cage was recorded on video.

Grooming test: The test was performed as previously described (14,15). Each mouse was put individually in a clean standard mouse cage and allowed to acclimate for 10 min. A video camera (C920r HD Pro, Japan) was set up two meters in front of the cage to record

the mice behavior for the next 10 min, following the habituation time. After the experiment, the cumulative time spent in self-grooming was counted by an experimenter through watching these videos. A stopwatch was used for scoring cumulative time spent grooming during the 10 min test session.

**PV-immunohistochemistry.** Immunohistochemistry of PV was performed as reported previously (7,13,16,17). Mice were anesthetized with 5% isoflurane and sodium pentobarbital (50 mg/kg), and perfused transcardially with 10 mL of saline, followed by 30 mL of ice-cold 4% paraformaldehyde in 0.1M phosphate buffer (pH 7.4). Brains were removed from the skulls and post fixed overnight at 4°C in the same fixative. For the immunohistochemical analysis, 50 µm-thick serial, coronal sections of brain tissue were cut in ice-cold 0.01M phosphate buffered saline (pH 7.4) using a vibrating blade microtome (VT1000s, Leica Microsystems, Tokyo, Japan). Mounted on gelatinized slides brain sections were washed by PBS for three times and then blocked in PBS containing 0.3% Triton X-100 (PBST) and 3% normal serum for 1 h at room temperature. The samples were then incubated for 24 h at 4°C with mouse polyclonal anti-parvalbumin (PV) antibody (1:100, abcam, ab11427) in PBST with 1% normal serum. After that the sections were washed three times in PBS and then incubated for 2 h in room temperature with Alexa Fluor 488 Polyclonal Antibody (1:1000, Invitrogen, A11094). Then, sections were washed three times in PBS containing 0.1% Triton X-100 and cover slipped under VECTASHIELD (Vector Laboratories, Inc. Burlingame, CA, USA). The PV-immunofluorescent-positive cells in the inflimbic (IL) and prelimbic (PrL) regions (0.05 mm<sup>2</sup>) of mPFC was analyzed using a fluorescence microscope with a CCD camera (Olympus IX70, Tokyo, Japan) and the SCION IMAGE software package. Images of sections within mPFC region were captured using a CFI PLan APO Lambda 40× objective with a Keyence BZ-X710 microscope (Keyence Corporation, Osaka, Japan).

**Measurement of amino acids.** On P28, mice were deeply anesthetized with isoflurane and plasma was collected. Subsequently, prefrontal cortex (PFC), hippocampus and striatum were quickly dissected on ice from whole brain. The dissected tissues were weighed and stored at -80°C until assayed. Levels of amino acids (glutamate, glutamine, glycine, L-serine, D-serine, GABA) were measured using high performance liquid chromatography system (Shimadzu Corporation, Kyoto, Japan), as reported previously (12,18,19).

**16S rRNA analysis and measurement of short-chain fatty acids of fecal samples.** On P28, we collected fresh fecal samples from each mouse at around 10:00 in order to avoid circadian effects on the microbiome. The fecal samples were put into a sterilized screw cap microtube immediately after defecation, and these samples were stored at -80°C until use. DNA extraction from mouse feces and 16S rRNA analysis of fecal samples were performed by MyMetagenome Co, Ltd. (Tokyo, Japan), as reported previously (20,21).

Measurement of short-chain fatty acids—acetic acid, propionic acid, butyric acid, lactic acid, and succinic acid—in fecal samples was performed by the TechnoSuruga Laboratory, Co., Ltd. (Shizuoka, Japan).

**Statistical analysis.** Analysis of the data was performed using GraphPad Prism (La Jolla, CA). Comparisons between two groups were performed using Student t-test. The PPI data were analyzed using multivariable analysis of variance (MANOVA). Comparisons among four groups were performed using the repeated measure two-way analysis of variance (ANOVA), two-way ANOVA or three-way ANOVA, followed by Fisher's LSD test. The P-values of less than 0.05 were considered statistically significant.

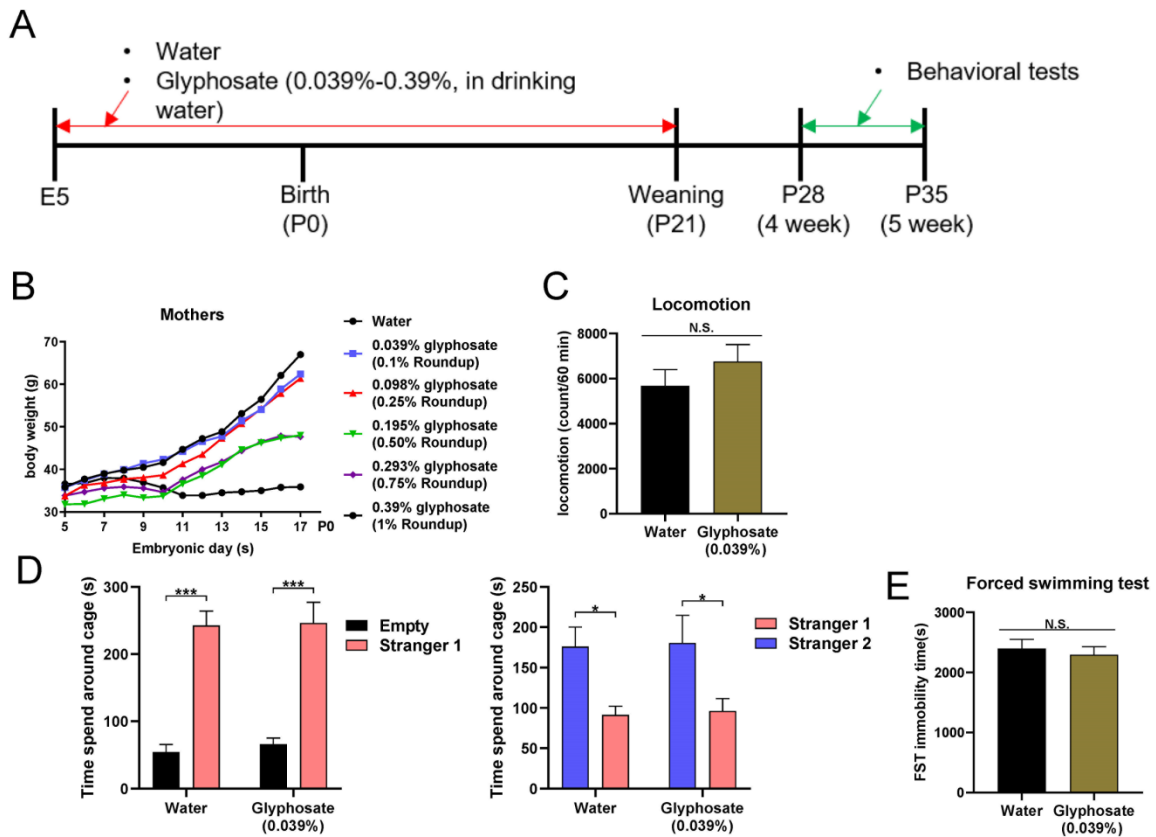

**Figure S1. General and behavioral data of mother and juvenile offspring after maternal glyphosate exposure.** (A): Schedule of treatment and behavioral tests. Water or formulated glyphosate [0.039% (w/v) (or 0.1% Roundup<sup>®</sup>) - 0.39% (w/v) (or 1.0% Roundup<sup>®</sup>)] were given to pregnant mice. (B): Change of body weight of mothers ( $n = 3 - 6$ ). (C): Locomotion. Data are shown as mean  $\pm$  S.E.M. ( $n = 10$ ). (D): Three chamber social interaction test. Left: Two-way ANOVA (glyphosate:  $F_{1,20} = 0.147$ ,  $P = 0.706$ ; stranger:  $F_{1,20} = 84.33$ ,  $P < 0.001$ ; interaction (glyphosate  $\times$  stranger):  $F_{1,20} = 0.038$ ,  $P = 0.848$ ). Right: Two-way ANOVA (glyphosate:  $F_{1,20} = 0.051$ ,  $P = 0.823$ ; stranger:  $F_{1,20} = 16.87$ ,  $P < 0.001$ ; interaction (glyphosate  $\times$  stranger):  $F_{1,20} < 0.001$ ,  $P = 0.998$ ). Data are shown as mean  $\pm$  S.E.M. ( $n = 6$ ). (E): Forced swimming test. Data are shown as mean  $\pm$  S.E.M. ( $n = 10$ ). N.S.: not significant.



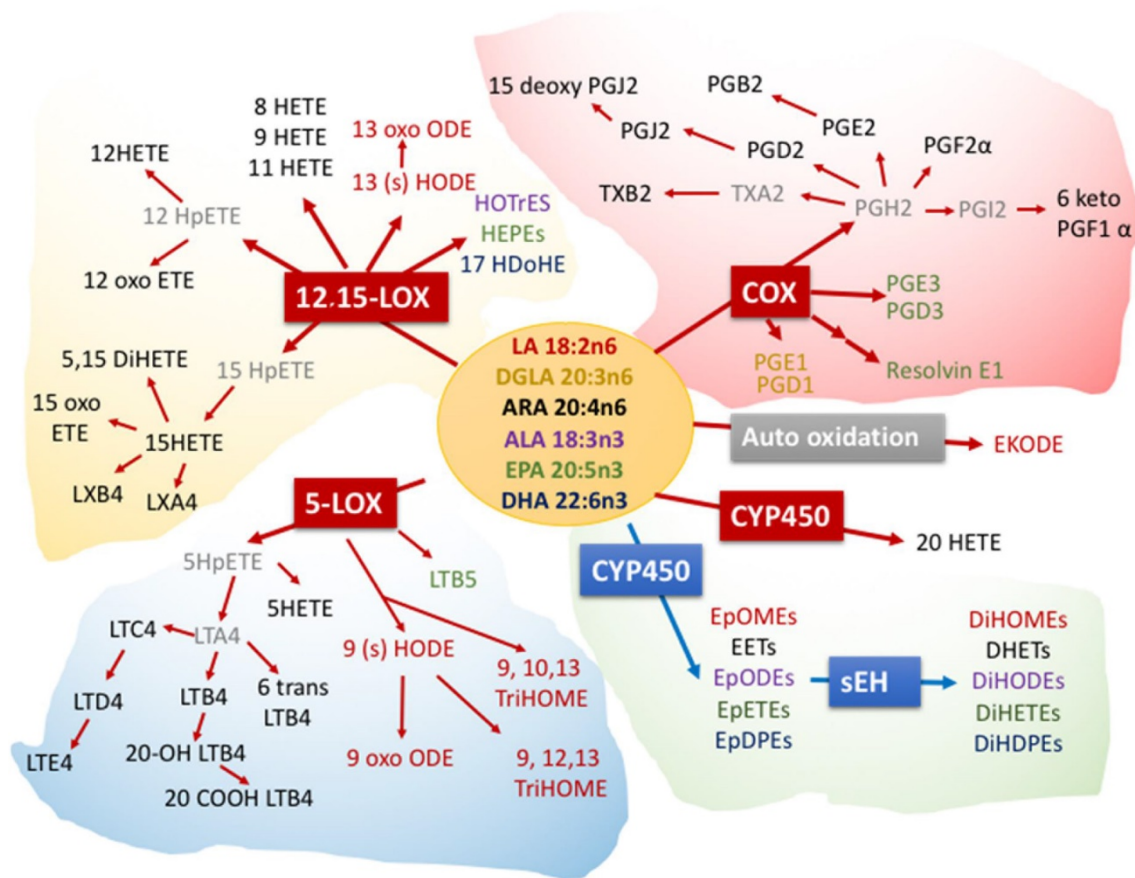

**Figure S2. Eicosanoids measured in the blood and brain regions from male juvenile offspring after maternal glyphosate exposure (7).**

Table S1. General and behavioral data of mother and juvenile offspring after maternal glyphosate exposure.

| Concentration                      | Number of mothers used | Alive number of mothers on P0 | maternal mortality | number of offspring born | Alive number of offspring on P21 | offspring mortality | Behavioral abnormality |
|------------------------------------|------------------------|-------------------------------|--------------------|--------------------------|----------------------------------|---------------------|------------------------|
| 0.39% glyphosate (1% Roundup®)     | 4                      | 0                             | 100%               | 0                        | 0                                | -                   | -                      |
| 0.293% glyphosate (0.75% Roundup®) | 4                      | 3                             | 25%                | 32                       | 4                                | 87.5%               | -                      |
| 0.195% glyphosate (0.50% Roundup®) | 5                      | 4                             | 20%                | 43                       | 2                                | 95.3%               | -                      |
| 0.098% glyphosate (0.25% Roundup®) | 3                      | 3                             | 0%                 | 30                       | 24                               | 20%                 | observed               |
| 0.039% glyphosate (0.1% Roundup®)  | 3                      | 3                             | 0%                 | 33                       | 33                               | 0%                  | Not observed           |

The concentration of glyphosate in the table is shown as the free base.

**Table S2. Oxylipin analysis in plasma**

| Compounds                 | Control (nmol/L) |   | Glyphosate (nmol/L) |                | P value |               |              |
|---------------------------|------------------|---|---------------------|----------------|---------|---------------|--------------|
| <b>6-keto-PGF1a</b>       | <b>0.408</b>     | ± | <b>0.047</b>        | <b>0.252</b>   | ±       | <b>0.043</b>  | <b>0.025</b> |
| TXB2                      | 0.776            | ± | 0.120               | 0.548          | ±       | 0.069         | 0.116        |
| 9,12,13-TriHOME           | 17.372           | ± | 2.022               | 12.758         | ±       | 1.096         | 0.060        |
| <b>9,10,13-TriHOME</b>    | <b>7.900</b>     | ± | <b>0.981</b>        | <b>5.220</b>   | ±       | <b>0.403</b>  | <b>0.021</b> |
| <b>PGF2a</b>              | <b>0.705</b>     | ± | <b>0.055</b>        | <b>0.462</b>   | ±       | <b>0.048</b>  | <b>0.004</b> |
| PGE2                      | 0.725            | ± | 0.013               | 0.704          | ±       | 0.010         | 0.219        |
| <b>PGD2</b>               | <b>0.193</b>     | ± | <b>0.012</b>        | <b>0.138</b>   | ±       | <b>0.010</b>  | <b>0.002</b> |
| <b>11,12-,15-TriHETrE</b> | <b>0.724</b>     | ± | <b>0.131</b>        | <b>0.300</b>   | ±       | <b>0.072</b>  | <b>0.011</b> |
| <b>19,20-DiHDPE</b>       | <b>10.277</b>    | ± | <b>0.591</b>        | <b>6.507</b>   | ±       | <b>0.444</b>  | <b>0.000</b> |
| 14,15-DiHETrE             | 0.686            | ± | 0.055               | 0.575          | ±       | 0.051         | 0.156        |
| LTB3                      | 2.586            | ± | 0.110               | 2.540          | ±       | 0.525         | 0.942        |
| <b>16,17-DiHDPE</b>       | <b>2.591</b>     | ± | <b>0.196</b>        | <b>1.955</b>   | ±       | <b>0.201</b>  | <b>0.036</b> |
| 11,12-DiHETrE             | 0.414            | ± | 0.034               | 0.394          | ±       | 0.045         | 0.726        |
| <b>13,14-DiHDPE</b>       | <b>0.731</b>     | ± | <b>0.036</b>        | <b>0.530</b>   | ±       | <b>0.056</b>  | <b>0.007</b> |
| EKODE                     | 23.079           | ± | 11.409              | 12.405         | ±       | 2.140         | 0.370        |
| <b>5,6-DiHETrE</b>        | <b>0.588</b>     | ± | <b>0.031</b>        | <b>0.417</b>   | ±       | <b>0.047</b>  | <b>0.007</b> |
| 8-HEPE                    | 7.786            | ± | 0.622               | 7.652          | ±       | 0.970         | 0.909        |
| 12-HEPE                   | 163.602          | ± | 36.795              | 92.380         | ±       | 15.026        | 0.090        |
| 5-HEPE                    | 11.079           | ± | 1.083               | 8.117          | ±       | 1.251         | 0.090        |
| <b>4,5-DiHDPE</b>         | <b>1.967</b>     | ± | <b>0.134</b>        | <b>1.527</b>   | ±       | <b>0.112</b>  | <b>0.022</b> |
| <b>13-HODE</b>            | <b>108.971</b>   | ± | <b>15.254</b>       | <b>66.733</b>  | ±       | <b>9.200</b>  | <b>0.029</b> |
| <b>9-HODE</b>             | <b>27.135</b>    | ± | <b>3.659</b>        | <b>17.293</b>  | ±       | <b>2.482</b>  | <b>0.039</b> |
| <b>15(16)-EpODE</b>       | <b>27.169</b>    | ± | <b>3.147</b>        | <b>14.493</b>  | ±       | <b>1.929</b>  | <b>0.004</b> |
| 15-HETE                   | 2.590            | ± | 0.326               | 1.985          | ±       | 0.228         | 0.146        |
| <b>17(18)-EpETE</b>       | <b>9.343</b>     | ± | <b>1.042</b>        | <b>4.845</b>   | ±       | <b>0.480</b>  | <b>0.002</b> |
| 17-HDoHE                  | 3948.481         | ± | 1343.355            | 1386.287       | ±       | 316.090       | 0.080        |
| <b>11-HETE</b>            | <b>2.434</b>     | ± | <b>0.172</b>        | <b>1.949</b>   | ±       | <b>0.131</b>  | <b>0.038</b> |
| 15-oxo-ETE                | 0.966            | ± | 0.150               | 0.746          | ±       | 0.105         | 0.244        |
| <b>14(15)-EpETE</b>       | <b>5.921</b>     | ± | <b>0.937</b>        | <b>2.316</b>   | ±       | <b>0.258</b>  | <b>0.003</b> |
| 8-HETE                    | 8.502            | ± | 0.959               | 7.349          | ±       | 0.718         | 0.349        |
| 12-HETE                   | 134.957          | ± | 20.785              | 90.069         | ±       | 11.494        | 0.075        |
| <b>11(12)-EpETE</b>       | <b>7.002</b>     | ± | <b>1.143</b>        | <b>2.579</b>   | ±       | <b>0.284</b>  | <b>0.002</b> |
| <b>8(9)-EpETE</b>         | <b>4.572</b>     | ± | <b>0.577</b>        | <b>0.863</b>   | ±       | <b>0.138</b>  | <b>0.000</b> |
| 9-HETE                    | 0.087            | ± | 0.014               | 0.056          | ±       | 0.012         | 0.120        |
| 15(S)-HETrE               | 1.229            | ± | 0.163               | 0.743          | ±       | 0.167         | 0.052        |
| 12-oxo-ETE                | 831.657          | ± | 164.846             | 500.173        | ±       | 99.031        | 0.102        |
| <b>5-HETE</b>             | <b>3.641</b>     | ± | <b>0.230</b>        | <b>2.137</b>   | ±       | <b>0.335</b>  | <b>0.002</b> |
| <b>19(20)-EpDPE</b>       | <b>49.406</b>    | ± | <b>6.516</b>        | <b>19.092</b>  | ±       | <b>1.307</b>  | <b>0.000</b> |
| <b>12(13)-EpOME</b>       | <b>94.456</b>    | ± | <b>12.455</b>       | <b>38.512</b>  | ±       | <b>4.378</b>  | <b>0.001</b> |
| <b>14(15)-EpETrE</b>      | <b>8.183</b>     | ± | <b>1.404</b>        | <b>4.038</b>   | ±       | <b>0.637</b>  | <b>0.019</b> |
| <b>9(10)-EpOME</b>        | <b>63.958</b>    | ± | <b>12.021</b>       | <b>28.326</b>  | ±       | <b>4.243</b>  | <b>0.016</b> |
| <b>16(17)-EpDPE</b>       | <b>19.080</b>    | ± | <b>3.183</b>        | <b>7.978</b>   | ±       | <b>0.799</b>  | <b>0.005</b> |
| <b>13(14)-EpDPE</b>       | <b>18.937</b>    | ± | <b>3.242</b>        | <b>8.177</b>   | ±       | <b>0.873</b>  | <b>0.007</b> |
| 5-oxo-ETE                 | 29.432           | ± | 4.666               | 20.987         | ±       | 2.839         | 0.151        |
| <b>10(11)-EpDPE</b>       | <b>29.647</b>    | ± | <b>4.960</b>        | <b>13.285</b>  | ±       | <b>1.234</b>  | <b>0.007</b> |
| <b>11(12)-EpETrE</b>      | <b>12.482</b>    | ± | <b>2.192</b>        | <b>6.360</b>   | ±       | <b>1.002</b>  | <b>0.026</b> |
| <b>7(8)-EpDPE</b>         | <b>402.209</b>   | ± | <b>66.364</b>       | <b>195.343</b> | ±       | <b>16.718</b> | <b>0.010</b> |
| <b>8(9)-EpETrE</b>        | <b>33.331</b>    | ± | <b>7.604</b>        | <b>13.892</b>  | ±       | <b>2.938</b>  | <b>0.042</b> |
| <b>5(6)-EpETrE</b>        | <b>41.145</b>    | ± | <b>6.192</b>        | <b>24.279</b>  | ±       | <b>3.524</b>  | <b>0.035</b> |

The value (nmol/L blood) are the mean ±SEM (n = 8 to 10). The bold is statistically significant. The green color means the compound decreased in glyphosate offspring compared with control.

**Table S3. Oxylipin analysis in PFC**

| Compounds                 | Control (pmol/g) |                  | Glyphosate (pmol/g) |                   | P value      |  |
|---------------------------|------------------|------------------|---------------------|-------------------|--------------|--|
| 6-keto-PGF1a              | 71.859           | ± 10.966         | 88.691              | ± 7.208           | 0.216        |  |
| <b>TXB2</b>               | <b>137.151</b>   | <b>± 16.944</b>  | <b>246.160</b>      | <b>± 16.777</b>   | <b>0.000</b> |  |
| 9,12,13-TriHOME           | 40.375           | ± 8.257          | 52.749              | ± 6.979           | 0.267        |  |
| 9,10,13-TriHOME           | 22.337           | ± 4.483          | 31.772              | ± 4.440           | 0.152        |  |
| <b>PGF2a</b>              | <b>244.053</b>   | <b>± 34.499</b>  | <b>431.431</b>      | <b>± 34.510</b>   | <b>0.001</b> |  |
| <b>PGE2</b>               | <b>90.158</b>    | <b>± 13.679</b>  | <b>137.389</b>      | <b>± 14.051</b>   | <b>0.027</b> |  |
| <b>PGD2</b>               | <b>322.348</b>   | <b>± 26.200</b>  | <b>439.532</b>      | <b>± 37.011</b>   | <b>0.019</b> |  |
| <b>11,12-,15-TriHETrE</b> | <b>14.229</b>    | <b>± 1.496</b>   | <b>27.925</b>       | <b>± 2.262</b>    | <b>0.000</b> |  |
| 19,20-DiHDPE              | 7.162            | ± 0.421          | 7.491               | ± 0.703           | 0.693        |  |
| <b>14,15-DiHETrE</b>      | <b>1.256</b>     | <b>± 0.120</b>   | <b>2.498</b>        | <b>± 0.243</b>    | <b>0.000</b> |  |
| LTB3                      | 45.708           | ± 18.777         | 53.423              | ± 26.072          | 0.816        |  |
| <b>16,17-DiHDPE</b>       | <b>0.707</b>     | <b>± 0.082</b>   | <b>1.154</b>        | <b>± 0.110</b>    | <b>0.004</b> |  |
| <b>11,12-DiHETrE</b>      | <b>0.863</b>     | <b>± 0.055</b>   | <b>1.383</b>        | <b>± 0.124</b>    | <b>0.001</b> |  |
| <b>13,14-DiHDPE</b>       | <b>0.431</b>     | <b>± 0.037</b>   | <b>0.851</b>        | <b>± 0.076</b>    | <b>0.000</b> |  |
| <b>EKODE</b>              | <b>9.547</b>     | <b>± 0.671</b>   | <b>12.663</b>       | <b>± 1.143</b>    | <b>0.030</b> |  |
| <b>5,6-DiHETrE</b>        | <b>0.404</b>     | <b>± 0.039</b>   | <b>0.699</b>        | <b>± 0.113</b>    | <b>0.024</b> |  |
| 8-HEPE                    | 1.054            | ± 0.155          | 0.959               | ± 0.080           | 0.592        |  |
| 12-HEPE                   | 3.702            | ± 1.166          | 6.850               | ± 1.105           | 0.066        |  |
| 5-HEPE                    | 1.554            | ± 0.180          | 1.760               | ± 0.234           | 0.494        |  |
| 4,5-DiHDPE                | 0.957            | ± 0.210          | 1.083               | ± 0.242           | 0.700        |  |
| 13-HODE                   | 40.531           | ± 2.810          | 45.239              | ± 3.261           | 0.288        |  |
| 9-HODE                    | 25.933           | ± 2.089          | 32.184              | ± 2.752           | 0.087        |  |
| <b>15(16)-EpODE</b>       | <b>1.095</b>     | <b>± 0.204</b>   | <b>0.500</b>        | <b>± 0.121</b>    | <b>0.022</b> |  |
| <b>15-HETE</b>            | <b>197.804</b>   | <b>± 29.559</b>  | <b>313.016</b>      | <b>± 24.240</b>   | <b>0.007</b> |  |
| <b>17(18)-EpETE</b>       | <b>0.588</b>     | <b>± 0.139</b>   | <b>3.729</b>        | <b>± 1.017</b>    | <b>0.007</b> |  |
| <b>17-HDoHE</b>           | <b>3452.039</b>  | <b>± 903.839</b> | <b>6200.527</b>     | <b>± 739.211</b>  | <b>0.030</b> |  |
| <b>11-HETE</b>            | <b>188.165</b>   | <b>± 23.250</b>  | <b>275.604</b>      | <b>± 19.707</b>   | <b>0.010</b> |  |
| <b>15-oxo-ETE</b>         | <b>6.740</b>     | <b>± 0.540</b>   | <b>10.104</b>       | <b>± 1.289</b>    | <b>0.027</b> |  |
| 14(15)-EpETE              | 0.590            | ± 0.140          | 1.633               | ± 0.487           | 0.054        |  |
| 8-HETE                    | 5.970            | ± 1.038          | 7.904               | ± 0.840           | 0.165        |  |
| <b>12-HETE</b>            | <b>125.575</b>   | <b>± 61.553</b>  | <b>448.365</b>      | <b>± 69.003</b>   | <b>0.003</b> |  |
| <b>11(12)-EpETE</b>       | <b>0.665</b>     | <b>± 0.211</b>   | <b>2.775</b>        | <b>± 0.733</b>    | <b>0.048</b> |  |
| 8(9)-EpETE                | 1.752            | ± 0.434          | 1.992               | ± 0.638           | 0.760        |  |
| 9-HETE                    | 0.893            | ± 0.173          | 1.826               | ± 0.587           | 0.145        |  |
| <b>15(S)-HETrE</b>        | <b>5.611</b>     | <b>± 0.977</b>   | <b>11.900</b>       | <b>± 1.029</b>    | <b>0.000</b> |  |
| <b>12-oxo-ETE</b>         | <b>1331.981</b>  | <b>± 114.969</b> | <b>2140.116</b>     | <b>± 142.081</b>  | <b>0.000</b> |  |
| <b>5-HETE</b>             | <b>13.471</b>    | <b>± 1.447</b>   | <b>18.560</b>       | <b>± 1.797</b>    | <b>0.041</b> |  |
| <b>19(20)-EpDPE</b>       | <b>89.030</b>    | <b>± 26.621</b>  | <b>353.450</b>      | <b>± 99.156</b>   | <b>0.019</b> |  |
| <b>12(13)-EpOME</b>       | <b>14.229</b>    | <b>± 3.214</b>   | <b>67.240</b>       | <b>± 21.629</b>   | <b>0.026</b> |  |
| <b>14(15)-EpETrE</b>      | <b>369.147</b>   | <b>± 105.708</b> | <b>1037.632</b>     | <b>± 291.994</b>  | <b>0.045</b> |  |
| <b>9(10)-EpOME</b>        | <b>11.898</b>    | <b>± 2.490</b>   | <b>57.775</b>       | <b>± 18.915</b>   | <b>0.027</b> |  |
| <b>16(17)-EpDPE</b>       | <b>49.169</b>    | <b>± 14.279</b>  | <b>195.454</b>      | <b>± 58.684</b>   | <b>0.026</b> |  |
| <b>13(14)-EpDPE</b>       | <b>44.704</b>    | <b>± 12.681</b>  | <b>190.175</b>      | <b>± 59.161</b>   | <b>0.027</b> |  |
| 5-oxo-ETE                 | 144.718          | ± 35.486         | 142.497             | ± 16.459          | 0.955        |  |
| <b>10(11)-EpDPE</b>       | <b>61.132</b>    | <b>± 17.665</b>  | <b>270.138</b>      | <b>± 86.641</b>   | <b>0.030</b> |  |
| 11(12)-EpETrE             | 364.169          | ± 88.308         | 1128.684            | ± 354.042         | 0.051        |  |
| <b>7(8)-EpDPE</b>         | <b>790.350</b>   | <b>± 192.868</b> | <b>3640.707</b>     | <b>± 1175.101</b> | <b>0.028</b> |  |
| <b>8(9)-EpETrE</b>        | <b>843.5</b>     | <b>± 202.2</b>   | <b>31.8</b>         | <b>± 17.1</b>     | <b>0.001</b> |  |
| 5(6)-EpETrE               | 1312.892         | ± 297.163        | 3862.881            | ± 1353.639        | 0.082        |  |

The value (pmol/g tissue) are the mean ±SEM (n = 8 to 10). The bold is statistically significant. The green color means the compound decreased in glyphosate offspring compared with control. The orange color means the compound increased in glyphosate offspring compared with control.

**Table S4. Oxylipin analysis in the hippocampus**

| Compounds                 | Control (pmol/g) |       | Glyphosate (pmol/g) |                | P value |               |              |
|---------------------------|------------------|-------|---------------------|----------------|---------|---------------|--------------|
| <b>6-keto-PGF1a</b>       | <b>210.973</b>   | $\pm$ | <b>17.307</b>       | <b>113.103</b> | $\pm$   | <b>15.509</b> | <b>0.001</b> |
| TXB2                      | 175.011          | $\pm$ | 15.917              | 198.203        | $\pm$   | 24.835        | 0.442        |
| 9,12,13-TriHOME           | 46.966           | $\pm$ | 7.670               | 51.599         | $\pm$   | 10.194        | 0.721        |
| 9,10,13-TriHOME           | 27.122           | $\pm$ | 4.287               | 29.123         | $\pm$   | 5.450         | 0.776        |
| <b>PGF2a</b>              | <b>463.947</b>   | $\pm$ | <b>37.827</b>       | <b>314.752</b> | $\pm$   | <b>30.178</b> | <b>0.006</b> |
| PGE2                      | 91.922           | $\pm$ | 10.680              | 68.947         | $\pm$   | 7.203         | 0.091        |
| <b>PGD2</b>               | <b>439.270</b>   | $\pm$ | <b>24.157</b>       | <b>349.020</b> | $\pm$   | <b>34.288</b> | <b>0.045</b> |
| <b>11,12-,15-TriHETrE</b> | <b>26.992</b>    | $\pm$ | <b>2.050</b>        | <b>20.278</b>  | $\pm$   | <b>1.789</b>  | <b>0.024</b> |
| <b>19,20-DiHDPE</b>       | <b>7.827</b>     | $\pm$ | <b>0.484</b>        | <b>5.359</b>   | $\pm$   | <b>0.322</b>  | <b>0.000</b> |
| 14,15-DiHETrE             | 1.375            | $\pm$ | 0.208               | 1.183          | $\pm$   | 0.095         | 0.412        |
| LTB3                      | 81.636           | $\pm$ | 17.998              | 13.669         | $\pm$   | n.d.          | n.d.         |
| 16,17-DiHDPE              | 0.753            | $\pm$ | 0.064               | 0.675          | $\pm$   | 0.093         | 0.500        |
| 11,12-DiHETrE             | 1.120            | $\pm$ | 0.106               | 0.914          | $\pm$   | 0.053         | 0.099        |
| 13,14-DiHDPE              | 0.493            | $\pm$ | 0.044               | 0.516          | $\pm$   | 0.089         | 0.823        |
| EKODE                     | 12.888           | $\pm$ | 1.489               | 11.362         | $\pm$   | 1.014         | 0.408        |
| 5,6-DiHETrE               | 0.561            | $\pm$ | 0.047               | 0.470          | $\pm$   | 0.051         | 0.205        |
| 8-HEPE                    | 1.151            | $\pm$ | 0.086               | 1.415          | $\pm$   | 0.182         | 0.205        |
| 12-HEPE                   | 15.321           | $\pm$ | 3.628               | 9.094          | $\pm$   | 3.984         | 0.263        |
| 5-HEPE                    | 1.900            | $\pm$ | 0.242               | 2.917          | $\pm$   | 0.708         | 0.191        |
| 4,5-DiHDPE                | 1.510            | $\pm$ | 0.192               | 1.572          | $\pm$   | 0.704         | 0.933        |
| 13-HODE                   | 59.332           | $\pm$ | 3.170               | 54.648         | $\pm$   | 8.929         | 0.627        |
| 9-HODE                    | 35.987           | $\pm$ | 1.888               | 31.282         | $\pm$   | 6.681         | 0.506        |
| <b>15(16)-EpODE</b>       | <b>0.726</b>     | $\pm$ | <b>0.163</b>        | <b>2.750</b>   | $\pm$   | <b>0.907</b>  | <b>0.033</b> |
| 15-HETE                   | 313.210          | $\pm$ | 26.117              | 263.402        | $\pm$   | 29.963        | 0.226        |
| 17(18)-EpETE              | 4.252            | $\pm$ | 3.461               | 1.592          | $\pm$   | 0.499         | 0.457        |
| 17-HDoHE                  | 5370.298         | $\pm$ | 389.810             | 5997.276       | $\pm$   | 762.508       | 0.474        |
| 11-HETE                   | 296.258          | $\pm$ | 22.047              | 261.315        | $\pm$   | 27.149        | 0.331        |
| 15-oxo-ETE                | 9.112            | $\pm$ | 0.576               | 8.232          | $\pm$   | 0.652         | 0.325        |
| 14(15)-EpETE              | 2.515            | $\pm$ | 2.018               | 0.712          | $\pm$   | 0.184         | 0.385        |
| <b>8-HETE</b>             | <b>10.308</b>    | $\pm$ | <b>0.983</b>        | <b>5.383</b>   | $\pm$   | <b>0.796</b>  | <b>0.001</b> |
| 12-HETE                   | 304.652          | $\pm$ | 79.838              | 131.250        | $\pm$   | 40.185        | 0.068        |
| 11(12)-EpETE              | 0.470            | $\pm$ | 0.147               | 1.254          | $\pm$   | 0.537         | 0.159        |
| <b>8(9)-EpETE</b>         | <b>0.912</b>     | $\pm$ | <b>0.145</b>        | <b>3.435</b>   | $\pm$   | <b>0.784</b>  | <b>0.008</b> |
| 9-HETE                    | 1.007            | $\pm$ | 0.194               | 2.073          | $\pm$   | 0.532         | 0.076        |
| 15(S)-HETrE               | 9.162            | $\pm$ | 1.121               | 7.994          | $\pm$   | 1.430         | 0.528        |
| 12-oxo-ETE                | 1524.203         | $\pm$ | 95.043              | 1245.436       | $\pm$   | 206.406       | 0.221        |
| 5-HETE                    | 19.187           | $\pm$ | 0.993               | 16.705         | $\pm$   | 0.992         | 0.094        |
| 19(20)-EpDPE              | 42.255           | $\pm$ | 7.441               | 55.856         | $\pm$   | 8.656         | 0.251        |
| 12(13)-EpOME              | 8.394            | $\pm$ | 1.398               | 11.355         | $\pm$   | 1.474         | 0.164        |
| 14(15)-EpETrE             | 213.663          | $\pm$ | 39.064              | 241.703        | $\pm$   | 26.592        | 0.561        |
| 9(10)-EpOME               | 7.129            | $\pm$ | 1.163               | 9.131          | $\pm$   | 1.032         | 0.216        |
| 16(17)-EpDPE              | 22.265           | $\pm$ | 4.447               | 29.112         | $\pm$   | 4.286         | 0.284        |
| 13(14)-EpDPE              | 19.371           | $\pm$ | 4.044               | 27.748         | $\pm$   | 3.955         | 0.158        |
| <b>5-oxo-ETE</b>          | <b>271.915</b>   | $\pm$ | <b>35.187</b>       | <b>94.461</b>  | $\pm$   | <b>9.488</b>  | <b>0.000</b> |
| <b>10(11)-EpDPE</b>       | <b>24.579</b>    | $\pm$ | <b>4.314</b>        | <b>40.179</b>  | $\pm$   | <b>5.185</b>  | <b>0.034</b> |
| 11(12)-EpETrE             | 190.566          | $\pm$ | 34.419              | 254.371        | $\pm$   | 33.701        | 0.204        |
| 7(8)-EpDPE                | 335.530          | $\pm$ | 58.928              | 460.824        | $\pm$   | 81.977        | 0.232        |
| <b>8(9)-EpETrE</b>        | <b>146.5</b>     | $\pm$ | <b>47.0</b>         | <b>2.4</b>     | $\pm$   | <b>1.2</b>    | <b>0.012</b> |
| 5(6)-EpETrE               | 731.031          | $\pm$ | 123.125             | 917.184        | $\pm$   | 134.826       | 0.323        |

The value (pmol/g tissue) are the mean  $\pm$ SEM (n = 8 to 10). The bold is statistically significant. The green color means the compound decreased in glyphosate offspring compared with control. The orange color means the compound increased in glyphosate offspring compared with control.

**Table S5 oxylipin analysis in striatum**

| Compounds                 | Control (pmol/g) |                  | Glyphosate (pmol/g) |                   | P value      |
|---------------------------|------------------|------------------|---------------------|-------------------|--------------|
| 6-keto-PGF1a              | 80.263           | ± 6.685          | 70.151              | ± 4.942           | 0.240        |
| <b>TXB2</b>               | <b>143.486</b>   | <b>± 9.763</b>   | <b>219.314</b>      | <b>± 15.121</b>   | <b>0.001</b> |
| 9,12,13-TriHOME           | 43.712           | ± 6.665          | 59.110              | ± 9.487           | 0.201        |
| 9,10,13-TriHOME           | 25.621           | ± 3.779          | 35.219              | ± 5.532           | 0.169        |
| PGF2a                     | 327.993          | ± 20.071         | 367.138             | ± 24.248          | 0.230        |
| PGE2                      | 62.314           | ± 6.350          | 61.254              | ± 3.057           | 0.882        |
| PGD2                      | 335.832          | ± 20.834         | 404.389             | ± 30.557          | 0.080        |
| <b>11,12-,15-TriHETrE</b> | <b>19.365</b>    | <b>± 1.301</b>   | <b>28.513</b>       | <b>± 2.432</b>    | <b>0.004</b> |
| 19,20-DiHDPE              | 8.381            | ± 0.316          | 8.734               | ± 0.672           | 0.640        |
| <b>14,15-DiHETrE</b>      | <b>1.607</b>     | <b>± 0.058</b>   | <b>2.399</b>        | <b>± 0.255</b>    | <b>0.007</b> |
| LTB3                      | 66.165           | ± 17.957         | 74.130              | ± 28.033          | 0.807        |
| <b>16,17-DiHDPE</b>       | <b>0.943</b>     | <b>± 0.039</b>   | <b>1.427</b>        | <b>± 0.114</b>    | <b>0.001</b> |
| 11,12-DiHETrE             | 1.230            | ± 0.075          | 1.461               | ± 0.114           | 0.108        |
| 13,14-DiHDPE              | 0.691            | ± 0.043          | 0.849               | ± 0.088           | 0.125        |
| EKODE                     | 15.864           | ± 2.271          | 14.223              | ± 1.256           | 0.535        |
| 5,6-DiHETrE               | 0.628            | ± 0.069          | 0.655               | ± 0.058           | 0.766        |
| 8-HEPE                    | 1.323            | ± 0.159          | 1.198               | ± 0.106           | 0.519        |
| 12-HEPE                   | 11.726           | ± 2.476          | 16.777              | ± 3.707           | 0.272        |
| 5-HEPE                    | 2.635            | ± 0.337          | 1.966               | ± 0.253           | 0.130        |
| 4,5-DiHDPE                | 1.376            | ± 0.224          | 1.331               | ± 0.320           | 0.910        |
| 13-HODE                   | 57.138           | ± 6.208          | 61.551              | ± 3.988           | 0.557        |
| 9-HODE                    | 36.146           | ± 2.792          | 42.211              | ± 2.648           | 0.132        |
| 15(16)-EpODE              | 0.811            | ± 0.270          | 0.837               | ± 0.335           | 0.954        |
| <b>15-HETE</b>            | <b>254.134</b>   | <b>± 17.641</b>  | <b>312.592</b>      | <b>± 16.237</b>   | <b>0.025</b> |
| <b>17(18)-EpETE</b>       | <b>1.025</b>     | <b>± 0.244</b>   | <b>7.282</b>        | <b>± 2.840</b>    | <b>0.042</b> |
| 17-HDoHE                  | 6589.296         | ± 752.871        | 7832.089            | ± 1004.299        | 0.335        |
| <b>11-HETE</b>            | <b>221.438</b>   | <b>± 13.362</b>  | <b>263.508</b>      | <b>± 14.043</b>   | <b>0.044</b> |
| 15-oxo-ETE                | 6.911            | ± 0.402          | 15.203              | ± 3.961           | 0.052        |
| <b>14(15)-EpETE</b>       | <b>0.760</b>     | <b>± 0.203</b>   | <b>2.368</b>        | <b>± 0.640</b>    | <b>0.023</b> |
| 8-HETE                    | 6.054            | ± 1.093          | 7.063               | ± 1.134           | 0.530        |
| 12-HETE                   | 254.764          | ± 57.123         | 402.213             | ± 68.023          | 0.114        |
| <b>11(12)-EpETE</b>       | <b>1.203</b>     | <b>± 0.270</b>   | <b>2.950</b>        | <b>± 0.707</b>    | <b>0.030</b> |
| 8(9)-EpETE                | 1.662            | ± 0.234          | 2.863               | ± 1.693           | 0.491        |
| 9-HETE                    | 1.098            | ± 0.293          | 2.001               | ± 0.403           | 0.086        |
| <b>15(S)-HETrE</b>        | <b>7.618</b>     | <b>± 0.587</b>   | <b>13.863</b>       | <b>± 0.898</b>    | <b>0.000</b> |
| <b>12-oxo-ETE</b>         | <b>966.895</b>   | <b>± 140.198</b> | <b>2383.322</b>     | <b>± 205.470</b>  | <b>0.000</b> |
| <b>5-HETE</b>             | <b>15.975</b>    | <b>± 1.179</b>   | <b>21.009</b>       | <b>± 1.874</b>    | <b>0.035</b> |
| <b>19(20)-EpDPE</b>       | <b>58.240</b>    | <b>± 11.472</b>  | <b>373.365</b>      | <b>± 128.458</b>  | <b>0.025</b> |
| <b>12(13)-EpOME</b>       | <b>11.880</b>    | <b>± 1.980</b>   | <b>75.548</b>       | <b>± 26.478</b>   | <b>0.028</b> |
| <b>14(15)-EpETrE</b>      | <b>206.025</b>   | <b>± 37.616</b>  | <b>991.031</b>      | <b>± 327.438</b>  | <b>0.028</b> |
| <b>9(10)-EpOME</b>        | <b>10.352</b>    | <b>± 2.057</b>   | <b>64.909</b>       | <b>± 24.089</b>   | <b>0.037</b> |
| <b>16(17)-EpDPE</b>       | <b>30.359</b>    | <b>± 6.931</b>   | <b>186.178</b>      | <b>± 73.985</b>   | <b>0.050</b> |
| <b>13(14)-EpDPE</b>       | <b>27.801</b>    | <b>± 5.702</b>   | <b>196.586</b>      | <b>± 72.402</b>   | <b>0.032</b> |
| <b>5-oxo-ETE</b>          | <b>256.279</b>   | <b>± 31.908</b>  | <b>177.806</b>      | <b>± 23.342</b>   | <b>0.063</b> |
| <b>10(11)-EpDPE</b>       | <b>39.670</b>    | <b>± 9.816</b>   | <b>283.118</b>      | <b>± 111.688</b>  | <b>0.044</b> |
| <b>11(12)-EpETrE</b>      | <b>208.934</b>   | <b>± 39.997</b>  | <b>1056.655</b>     | <b>± 383.807</b>  | <b>0.041</b> |
| <b>7(8)-EpDPE</b>         | <b>528.009</b>   | <b>± 139.936</b> | <b>3684.482</b>     | <b>± 1464.079</b> | <b>0.046</b> |
| <b>8(9)-EpETrE</b>        | <b>318.5</b>     | <b>± 109.4</b>   | <b>18.8</b>         | <b>± 7.2</b>      | <b>0.019</b> |
| <b>5(6)-EpETrE</b>        | <b>821.143</b>   | <b>± 187.923</b> | <b>2286.424</b>     | <b>± 589.971</b>  | <b>0.024</b> |

The value (pmol/g tissue) are the mean ±SEM (n = 9 to 10). The bold is statistically significant. The green color means the compound decreased in glyphosate offspring compared with control. The orange color means the compound increased in glyphosate offspring compared with control.



## Abbreviations in Table S2 – Table S5

| Abbreviation       | Formal Name                                                           |
|--------------------|-----------------------------------------------------------------------|
| 6-keto-PGF1a       | 6-oxo-9S,11R,15S-trihydroxy-13E-prostenoic acid                       |
| TXB2               | 9S,11,15S-trihydroxy-thromboxa-5Z,13E-dien-1-oic acid                 |
| 9,12,13-TriHOME    | 9S,12S,13S-trihydroxy-10E-octadecenoic acid                           |
| 9,10,13-TriHOME    | 9S,10,13-Trihydroxy-11-octadecenoic acid                              |
| PGF2a              | 7-(3,5-Dihydroxy-2-(3-hydroxy-1-octenyl)cyclopentyl)-5-heptenoic acid |
| PGE2               | (5Z,11alpha,13E,15S)-11,15-dihydroxy-9-oxoprostanoic acid             |
| PGD2               | (5Z,13E,15S)-9alpha,15-Dihydroxy-11-oxoprostanoic acid                |
| 11,12-,15-TriHETrE | (8E,11Z,13E)-11,12,15-trihydroxyicosanoic acid                        |
| 19,20-DiHDPE       | 19,20-dihydroxy-4Z,7Z,10Z,13Z,16Z-docosapentaenoic acid               |
| 14,15-DiHETrE      | (5Z,8Z,11Z)-14,15-Dihydroxyicosanoic acid                             |
| LTB3               | (5R,6E,8Z,10E,12S)-5,12-dihydroxyicosanoic acid                       |
| 16,17-DiHDPE       | 16,17-dihydroxy-4Z,7Z,10Z,13Z,19Z-docosapentaenoic acid               |
| 11,12-DiHETrE      | (5Z,8Z,14Z)-11,12-Dihydroxyicosanoic acid                             |
| 13,14-DiHDPE       | 13,14-dihydroxy-4Z,7Z,10Z,16Z,19Z-docosapentaenoic acid               |
| EKODE              | 9-Oxo-11-(3-pentyl-2-oxiranyl)-10E-undecenoic acid                    |
| 5,6-DiHETrE        | (8Z,11Z,14Z)-5,6-Dihydroxyicosanoic acid                              |
| 8-HEPE             | 8-hydroxy-5Z,9E,11Z,14Z,17Z-eicosapentaenoic acid                     |
| 12-HEPE            | 12-hydroxy-5Z,8Z,10E,14Z,17Z-eicosapentaenoic acid                    |
| 5-HEPE             | 5-Hydroxyeicosapentaenoic acid                                        |
| 4,5-DiHDPE         | 7,8-dihydroxy-4Z,10Z,13Z,16Z,19Z-docosapentaenoic acid                |
| 13-HODE            | (9Z,11E)-13-hydroxyoctadecadienoic acid                               |
| 9-HODE             | 9-hydroxy-10E,12Z-octadecadienoic acid                                |
| 15(16)-EpODE       | 15(16)-epoxy-9Z,12Z-octadecadienoic acid                              |
| 15-HETE            | 15-hydroxy-5Z,8Z,11Z,13E-eicosatetraenoic acid                        |
| 17(18)-EpETE       | 17(18)-epoxy-5Z,8Z,11Z,14Z-eicosatetraenoic acid                      |
| 17-HDoHE           | 17-Hydroxy-4,7,10,13,15,19-docosahexaenoic acid                       |
| 11-HETE            | 11-Hydroxy-5Z,8Z,12E,14Z-eicosatetraenoic acid                        |
| 15-oxo-ETE         | (5Z,8Z,11Z,13E)-15-oxoicosanoic acid                                  |
| 14(15)-EpETE       | 14(15)-Epoxy-5Z,8Z,11Z,17Z-eicosatetraenoic acid                      |
| 8-HETE             | 8-hydroxy-5Z,9E,11Z,14Z-eicosatetraenoate                             |
| 12-HETE            | 12-hydroxy-5Z,8Z,10E,14Z-eicosatetraenoic acid                        |
| 11(12)-EpETE       | 11(12)-epoxy-5Z,8Z,14Z,17Z-eicosatetraenoic acid                      |
| 8(9)-EpETE         | 8(9)-Epoxy-5Z,11Z,14Z,17Z-eicosatetraenoic acid                       |
| 9-HETE             | 9-hydroxy-5Z,7E,11Z,14Z-eicosatetraenoic acid                         |
| 15(S)-HETrE        | 15-hydroxy-(8Z,11Z,13E)-eicosatrienoic acid                           |
| 12-oxo-ETE         | 12-oxo-5Z,8Z,10E,14Z-eicosatetraenoic acid                            |
| 5-HETE             | 5-Hydroxyeicosatetraenoic acid                                        |
| 19(20)-EpDPE       | 19(20)-epoxy-4Z,7Z,10Z,13Z,16Z-docosapentaenoic acid                  |
| 12(13)-EpOME       | (9Z)-12,13-epoxyoctadecenoic acid                                     |
| 14(15)-EpETrE      | 14,15-epoxy-5Z,8Z,11Z-eicosatrienoic acid                             |
| 9(10)-EpOME        | 9,10-epoxy-12Z-octadecenoic acid                                      |
| 16(17)-EpDPE       | 16(17)-epoxy-4Z,7Z,10Z,13Z,19Z-docosapentaenoic acid                  |
| 13(14)-EpDPE       | 13(14)-epoxy-4Z,7Z,10Z,16Z,19Z-docosapentaenoic acid                  |
| 5-oxo-ETE          | 5-oxo-6E,8Z,11Z,14Z-eicosatetraenoic acid                             |
| 10(11)-EpDPE       | 10(11)-epoxy-4Z,7Z,13Z,16Z,19Z-docosapentaenoic acid                  |
| 11(12)-EpETrE      | (5Z,8Z,14Z)-11,12-Epoxyicosanoic acid                                 |
| 7(8)-EpDPE         | 7(8)-epoxy-4Z,10Z,13Z,16Z,19Z-docosapentaenoic acid                   |
| 8(9)-EpETrE        | 8,9-Epoxy-5,11,14-icosatrienoic acid                                  |
| 5(6)-EpETrE        | 4-(3-tetradeca-2,5,8-trienyloxiran-2-yl)butanoic acid                 |

**Table 6. Levels of NMDAR-related amino acids in the plasma, PFC, hippocampus, and striatum of offspring**

|                                     | Glutamate               | Glutamine        | Glycine               | L-Serine              | D-Serine                | GABA                  |
|-------------------------------------|-------------------------|------------------|-----------------------|-----------------------|-------------------------|-----------------------|
| <b>Plasma (nmol/ml)</b>             |                         |                  |                       |                       |                         |                       |
| Control                             | 60.047 ± 5.976          | 508.014 ± 13.285 | 333.402 ± 13.215      | 148.271 ± 6.711       | 3.841 ± 0.293           |                       |
| Glyphosate                          | <b>38.003 ± 1.974**</b> | 496.268 ± 15.748 | 354.185 ± 9.806       | 144.824 ± 4.622       | <b>7.522 ± 0.578***</b> |                       |
| <b>PFC (nmol/mg tissue)</b>         |                         |                  |                       |                       |                         |                       |
| Control                             | 11.827 ± 0.293          | 5.486 ± 0.194    | 0.804 ± 0.033         | 0.712 ± 0.032         | 0.345 ± 0.017           | 2.243 ± 0.048         |
| Glyphosate                          | <b>10.392 ± 0.377**</b> | 5.053 ± 0.243    | <b>0.705 ± 0.023*</b> | <b>0.622 ± 0.016*</b> | 0.313 ± 0.010           | <b>2.060 ± 0.058*</b> |
| <b>Hippocampus (nmol/mg tissue)</b> |                         |                  |                       |                       |                         |                       |
| Control                             | 11.477 ± 0.295          | 4.979 ± 0.147    | 0.962 ± 0.143         | 0.764 ± 0.041         | 0.277 ± 0.011           | 2.736 ± 0.306         |
| Glyphosate                          | <b>9.350 ± 0.282***</b> | 4.765 ± 0.137    | 0.725 ± 0.030         | 0.662 ± 0.037         | 0.259 ± 0.017           | 2.469 ± 0.097         |
| <b>Striatum (nmol/mg tissue)</b>    |                         |                  |                       |                       |                         |                       |
| Control                             | 8.712 ± 0.348           | 5.756 ± 0.302    | 0.757 ± 0.041         | 0.771 ± 0.056         | 0.309 ± 0.022           | 2.925 ± 0.177         |
| Glyphosate                          | <b>7.745 ± 0.141*</b>   | 5.735 ± 0.319    | 0.755 ± 0.039         | 0.715 ± 0.032         | 0.281 ± 0.010           | 3.076 ± 0.151         |

Data are expressed as the mean ± SEM (Control: n = 9, Glyphosate: n = 10). The bold is statistically significant. \*P < 0.05, \*\*P < 0.01, \*\*\*P < 0.001 compared to control group (Student's t test).



## SI References

1. Ji H, Xu L, Wang Z, Fan X, Wu L (2018) Differential microRNA expression in the prefrontal cortex of mouse offspring induced by glyphosate exposure during pregnancy and lactation. *Exp Ther Med* 15:2457–2467.
2. Yu N, et al. (2018) Circular RNA expression profiles in hippocampus from mice with perinatal glyphosate exposure. *Biochem Biophys Res Commun* 501:838–845.
3. Williams GM, Kroes R, Munro IC (2000) Safety evaluation and risk assessment of the herbicide Roundup and its active ingredient, glyphosate, for humans. *Regul Toxicol Pharmacol* 31:117–165.
4. Yang J, Schmelzer K, Georgi K, Hammock BD (2009) Quantitative profiling method for oxylipin metabolome by liquid chromatography electrospray ionization tandem mass spectrometry. *Anal Chem* 81:8085–8093.
5. Ren Q, et al. (2016) Gene deficiency and pharmacological inhibition of soluble epoxide hydrolase confers resilience to repeated social defeat stress. *Proc Natl Acad Sci USA* 113:E1944–E1952.
6. Ren Q, et al. (2018) Soluble epoxide hydrolase plays a key role in the pathogenesis of Parkinson's disease. *Proc Natl Acad Sci USA* 115:E5815–E5823.
7. Ma M, et al. (2019) Key role of soluble epoxide hydrolase in the neurodevelopmental disorders of offspring after maternal immune activation. *Proc Natl Acad Sci USA* 116:7083–7088.
8. Hashimoto K, Fujita Y, Shimizu E, Iyo M (2005) Phencyclidine-induced cognitive deficits in mice are improved by subsequent subchronic administration of clozapine, but not haloperidol. *Eur J Pharmacol* 519:114–117.
9. Hashimoto K, et al. (2009) Co-administration of a D-amino acid oxidase inhibitor potentiates the efficacy of D-serine in attenuating prepulse inhibition deficits after administration of dizocilpine. *Biol Psychiatry* 65:1103–1106.
10. Matsuura A, Fujita Y, Iyo M, Hashimoto K (2015) Effects of sodium benzoate on pre-pulse inhibition deficits and hyperlocomotion in mice after administration of phencyclidine. *Acta Neuropsychiatr* 27:159–167.
11. Shirai Y, et al. (2015) Dietary intake of sulforaphane-rich broccoli sprout extracts during juvenile and adolescence can prevent phencyclidine-induced cognitive deficits at adulthood. *PLoS One* 10:e0127244.
12. Fujita Y, Ishima T, Hashimoto K (2016) Supplementation with D-serine prevents the onset of cognitive deficits in adult offspring after maternal immune activation. *Sci Rep* 6:37261.
13. Han M, et al (2016) Intake of 7,8-dihydroxyflavone during juvenile and adolescent stages prevents onset of psychosis in adult offspring after maternal immune activation. *Sci Rep* 6:36087.
14. McFarlane HG, et al (2008) Autism-like behavioral phenotypes in BTBR T+tf/J mice. *Genes Brain Behav* 7:152–163.

15. Yang M, Zhodzishsky V, Crawley JN (2007) Social deficits in BTBR T+tf/J mice are unchanged by cross-fostering with C57BL/6J mothers. *Int J Dev Neurosci* 25:515–521.
16. Matsuura A, et al. (2018) Dietary glucoraphanin prevents the onset of psychosis in the adult offspring after maternal immune activation. *Sci Rep* 8:2158.
17. Yang C, Han M, Zhang JC, Ren Q, Hashimoto K (2016) Loss of parvalbumin-immunoreactivity in mouse brain regions after repeated intermittent administration of esketamine, but not *R*-ketamine. *Psychiatry Res* 239:281–283.
18. Hashimoto K, et al. (2016) Increased serum levels of serine enantiomers in patients with depression. *Acta Neuropsychiatr* 28:173–178.
19. Ma M, et al. (2017) Alterations in amino acid levels in mouse brain regions after adjunctive treatment of brexpiprazole with fluoxetine: comparison with (*R*)-ketamine. *Psychopharmacology (Berl)* 234:3165–3173.
20. Pu Y, Chang L, Qu Y, Wang S, Zhang K, Hashimoto K (2019) Antibiotic-induced microbiome depletion protects against MPTP-induced dopaminergic neurotoxicity in the brain. *Aging (Albany NY)* 11:6915–6929.
21. Wang S, Qu Y, Chang L, Pu Y, Zhang K, Hashimoto K (2020) Antibiotic-induced microbiome depletion is associated with resilience in mice after chronic social defeat stress. *J Affect Disord* 260:448–457.
